# Supplementary material
Source: PubMed Central journal article supplement (PMC2630102)
Supplement: 0806196106_ST1_PDF.pdf [file 0806196106_ST1_PDF.pdf]

**Table S1: Description of model input and outputs.**

|    | <b>Input</b>   | <b>Description</b>                             | <b>Value</b>                                                                                                                   |                              |
|----|----------------|------------------------------------------------|--------------------------------------------------------------------------------------------------------------------------------|------------------------------|
| 1  | $M$            | Mitogen level                                  | 1.8 (normal simulations).<br>2.3 (cyclin E <sup>-/-</sup> , final model).<br>11 (cyclin D <sup>-/-</sup> final model).         |                              |
| 2  | $p53\_damage$  | Level of p53                                   | Value of $p53(t)$ from upstream network (initial model).<br>1 during arrest, 0 during free cycling (fitting and final model).  |                              |
| 3  | $Chk2\_damage$ | Level of Chk2                                  | Value of $Chk2(t)$ from upstream network (initial model).<br>1 during arrest, 0 during free cycling (fitting and final model). |                              |
| 4  | $CycD\_ko$     | Cyclin D knockout                              | 1 (cyclin D <sup>-/-</sup> simulations)<br>0 (all other simulations)                                                           |                              |
| 5  | $CycE\_ko$     | Cyclin E knockout                              | 1 (cyclin E <sup>-/-</sup> simulations)<br>0 (all other simulations)                                                           |                              |
| 6  | $CHX$          | Cycloheximide level                            | 0.25 (cycloheximide-induced arrest simulations)<br>0 (all other simulations)                                                   |                              |
| 7  | $p53\_basal$   | Basal p53 level                                | 0.75 (p53 <sup>+/+</sup> simulations)<br>0 (all other simulations)                                                             |                              |
| 8  | $Arrest\_I$    | p53-dependent p21 activation                   | 0 or 1, depending on whether this arrest mechanism is active                                                                   |                              |
| 9  | $Arrest\_II$   | Chk2-dependent Cdc25 phosphorylation           | 0 or 1                                                                                                                         |                              |
| 10 | $Arrest\_III$  | p53-dependent Cyclin A and Cyclin B repression | 0 or 1                                                                                                                         |                              |
|    | <b>Output</b>  | <b>Description</b>                             | <b>Species contained</b>                                                                                                       | <b>Quantities Influenced</b> |

|   |               |                            |                        |                                                |
|---|---------------|----------------------------|------------------------|------------------------------------------------|
| 1 | <i>CycET</i>  | Total cyclin E             | CycE+TriE+<br>TriE21   | Steady-state<br>level reached<br>during arrest |
| 2 | <i>CycBT</i>  | Total cyclin B             | CycB+pB+BCKI<br>+pBCKI | Steady-state<br>level reached<br>during arrest |
| 3 | <i>CycE</i>   | Active cyclin E            | CycE                   | Time of the<br>G1/S<br>transition              |
| 4 | <i>pB</i>     | Phosphorylated<br>cyclin B | pB                     | Time of the<br>S/G2<br>transition              |
| 5 | <i>Cdc20A</i> | APC/C <sup>Cdc20A</sup>    | Cdc20A                 | Time of<br>mitosis                             |
