# Supplementary material
Source: PubMed Central journal article supplement (PMC2630102)
Supplement: 0806196106_ST2_PDF.pdf [file 0806196106_ST2_PDF.pdf]

**Table S2: Simulations used in optimization.**

|   | Simulation                           | Terms computed                                                                               | Description                                                                                                                                            | Input times                                                             |
|---|--------------------------------------|----------------------------------------------------------------------------------------------|--------------------------------------------------------------------------------------------------------------------------------------------------------|-------------------------------------------------------------------------|
| 1 | P53 <sup>-/-</sup> free cycling      | $\tau_{G1}^{(1)}, \tau_{G2}^{(1)}$                                                           | Match observed fractions of G1, S and G2 cells                                                                                                         | Simulated for 3 cell cycles                                             |
| 2 | p53 <sup>-/-</sup> arrested          | $r_{CycET}^{(2,1)}, r_{CycBT}^{(2,1)}, \ \dot{\mathbf{x}}_{ss}^{(2)}\ ^2$                    | Match steady state values of cyclins E and B                                                                                                           | Arrest applied at 15 h; simulated for 200 h                             |
| 3 | Wild-type, free cycling              | $\tau_{G1}^{(3)}, \tau_{G2}^{(3)}$                                                           | Match observed fractions of G1, S and G2 cells                                                                                                         | Simulated for 3 cell cycles                                             |
| 4 | Wild-type, arrested                  | $r_{CycET}^{(4,3)}, r_{CycBT}^{(4,3)}, \ \dot{\mathbf{x}}_{ss}^{(4)}\ ^2$                    | Match steady state values of cyclins E and B                                                                                                           | Arrest applied at 15 h; simulated for 200 h                             |
| 5 | Cyclin D <sup>-/-</sup>              | $T^{(5)}, T^{(1)}$                                                                           | Ensure that knockout cell line still cycles                                                                                                            | Simulated for three cell cycles                                         |
| 6 | Cyclin E <sup>-/-</sup>              | $T^{(6)}, T^{(1)}$                                                                           | Ensure that knockout cell line still cycles                                                                                                            | Simulated for three cell cycles                                         |
| 7 | Cycloheximide pre-restriction point  | $r_{CycET}^{(7,3)}, \ \dot{\mathbf{x}}_{ss}^{(7)}\ ^2$                                       | When applied before restriction point, cells arrest with high <i>CycET</i>                                                                             | Cycloheximide applied at 3 h after first division. Simulated for 200 h  |
| 8 | Cycloheximide post-restriction point | $r_{CycET}^{(8,3)}, r_{CycE}^{(8,3)}, r_{Cdc20A}^{(8,3)}, \ \dot{\mathbf{x}}_{ss}^{(8)}\ ^2$ | When applied after restriction point, cells arrest with high <i>CycET</i> , low <i>CycE</i> , and undergo one cell division with a <i>Cdc20A</i> pulse | Cycloheximide applied at 20 h after first division. Simulated for 200 h |
