# Supplementary material
Source: PubMed Central journal article supplement (PMC2630102)
Supplement: 0806196106_ST3_PDF.pdf [file 0806196106_ST3_PDF.pdf]

**Table S3: Parameters left unconstrained by optimization to the objective function.**

| Parameter name | Biochemical role                                                | Allowed parameter change |
|----------------|-----------------------------------------------------------------|--------------------------|
| kass21e        | p21-cyclin E association rate                                   | $>10^{10}$               |
| kasse          | p27-cyclin E association rate                                   | $>10^{10}$               |
| kass21d        | p21-cyclin D association rate                                   | $>10^{10}$               |
| kassa          | p27-cyclin A association rate                                   | $>10^{10}$               |
| kiwee_pp       | rate of cyclin B-promoted Wee1 inactivation                     | $9.93 \times 10^2$       |
| kdie_pp        | rate of cyclin E-promoted p27 degradation                       | $4.49 \times 10^2$       |
| kdisse         | p21-cyclin E dissociation rate                                  | 4.53                     |
| kdib_pp        | rate of cyclin B-promoted p27 degradation                       | 3.02                     |
| kdia_pp        | rate of cyclin A-promoted p27 degradation                       | 2.92                     |
| Kp53a          | dissociation constant for p53 repression of cyclin A            | 2.80                     |
| J20            | Michaelis-Menten constant for Cdc20 phosphorylation by Cyclin B | 2.06                     |
