# Supplementary material
Source: PubMed Central journal article supplement (PMC2630102)
Supplement: 0806196106_ST4_PDF.pdf [file 0806196106_ST4_PDF.pdf]

**Table S4: Knockout predictions and results.**

| Condition                 | Cycles ( $M=2$ ) | Cycles ( $M=16$ ) | Cycles (Expt)  | Arrest (IR; predicted) |
|---------------------------|------------------|-------------------|----------------|------------------------|
| CycD <sup>-/-</sup>       | No               | Yes               | Yes (14)       | Arrests normally       |
| CycE <sup>-/-</sup>       | Yes              | Yes               | Yes (15)       | Arrests normally       |
| <b>CycA<sup>-/-</sup></b> | <b>Yes</b>       | <b>Yes</b>        | <b>No (20)</b> | Arrests normally       |
| CycB <sup>-/-</sup>       | No               | No                | No (21)        | --                     |
| CKI <sup>-/-</sup>        | Yes              | Yes               | Yes (22)       | Arrests normally       |
| Cdc20 <sup>-/-</sup>      | No               | No                | No (23)        | --                     |
| Cdh1 <sup>-/-</sup>       | Yes              | Yes               | Yes (18)       | Continues cycling (18) |
| Wee1 <sup>-/-</sup>       | Yes              | Yes               | No* (24)       | Arrests normally       |
| Cdc25 <sup>-/-</sup>      | No               | No                | No (25)        | --                     |
| TFE <sup>-/-</sup>        | No               | No                | No (26)        | --                     |
| TFB <sup>-/-</sup>        | No               | No                | --             | --                     |
| APC <sup>-/-</sup>        | No               | No                | No (27)        | --                     |
